# Supplementary material for: Simultaneous realization of highly efficient electromagnetic interference shielding and human motion detection in carbon fiber felt decorated with silver nanowires and thermoplastic polyurethane
Source: Royal Society of Chemistry journal article supplement (doi:10.1039/d1tc01099a), 2021-01-01
Supplement: d1tc01099a1.pdf [file d1tc01099a1.pdf]

# **Simultaneous realization of highly efficient electromagnetic interference shielding and human motions detection in carbon fiber felts decorated with silver nanowires and thermoplastic polyurethane**

Zhengzheng Guo<sup>a</sup>, Penggang Ren<sup>a,b,\*</sup>, Zengping Zhang<sup>c</sup>, Zhong Dai<sup>a</sup>, Kaidi Hui<sup>b</sup>, Huanhuan Yan<sup>b</sup>,  
Yanling Jin<sup>b</sup>, Jiefeng Gao<sup>d</sup>, Fang Ren<sup>b,\*</sup>

*a. School of Materials Science and Engineering, Xi'an University of Technology, Xi'an Shaanxi 710048, People's Republic of China*

*b. The Faculty of Printing, Packaging Engineering and Digital Media Technology, Xi'an University of Technology, Xi'an Shaanxi 710048, People's Republic of China*

*c. Key Laboratory for Special Area Highway Engineering of Ministry of Education, Chang'an University, Xi'an Shaanxi 710064, People's Republic of China*

*d. School of Chemistry and Chemical Engineering, Yangzhou University, Yangzhou Jiangsu 225002, People's Republic of China*

*\*Corresponding Author: [rengpg@126.com](mailto:rengpg@126.com); [renfang0824@163.com](mailto:renfang0824@163.com)*

## **1. The AgNWs contents in TA-x**

The exact AgNWs content in the prepared TA-x were obtained by measuring the weight of pure CFF and TA-x, and the corresponding results were shown in [Fig. S1](#). The AgNWs content in TA-x increases with the increasing dipping-drying cycles. The actual contents of AgNWs in TA-1, TA-3, TA-5, TA-7 and TA-9 are 0.81 wt%, 2.61 wt%, 3.89 wt%, 5.35 wt% and 7.85 wt%, respectively.

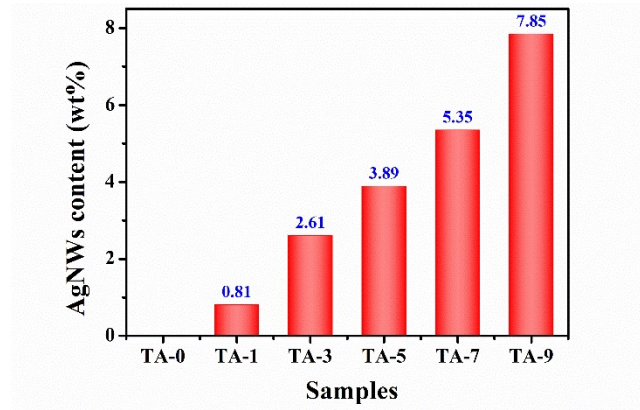

**Fig. S1.** The AgNWs contents in TA-*x*.

## 2. SEM of CFF covered by a thin TPU layer

The SEM images in Fig. S2 present an obvious thin TPU layer covering on the surface of CFF (TA-0). The surface of CFF shows no significant change with the introduction of TPU.

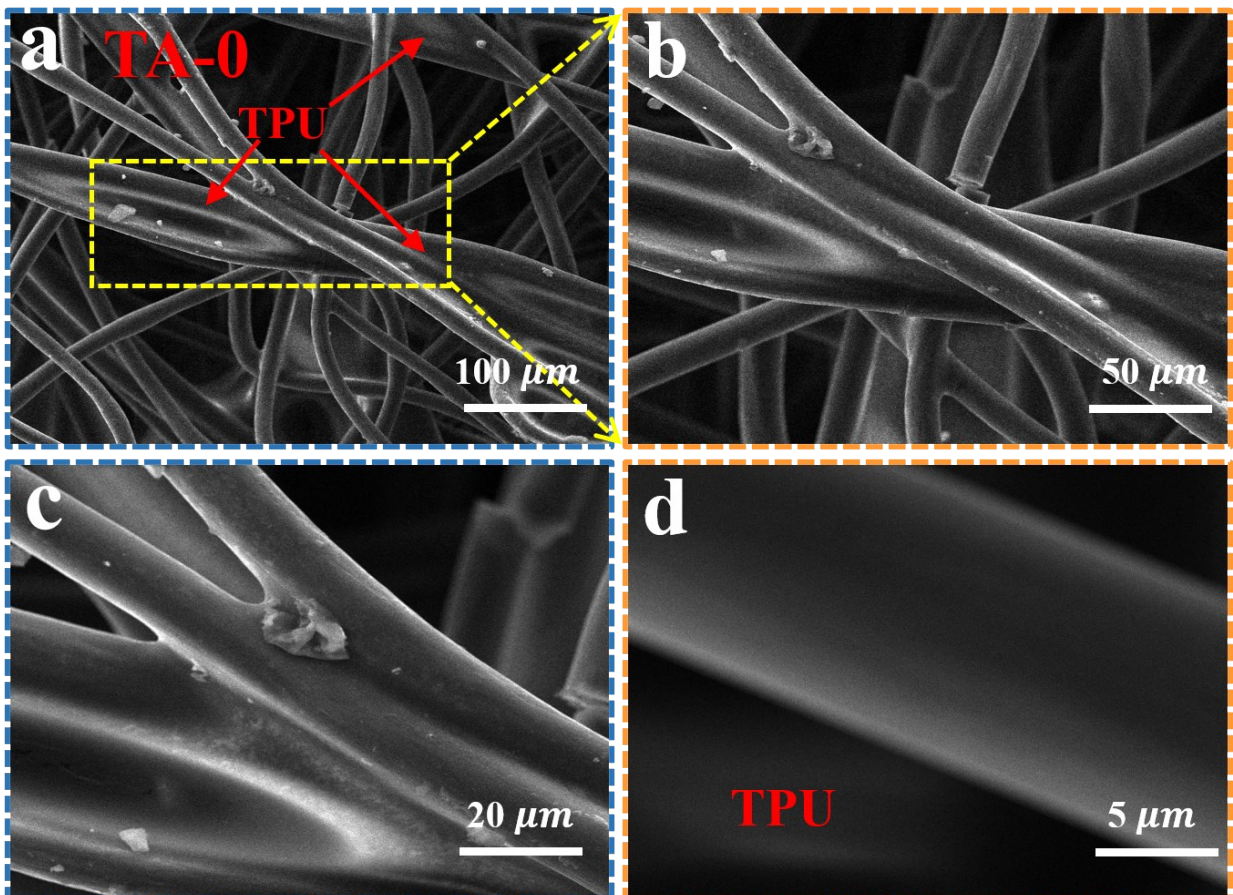

**Fig. S2.** The SEM of CFF covered by a thin TPU layer.

## 3. The power coefficients the TPU-coated AgNWs@CFF

To describe the shielding mechanism of the prepared TA-*x*, the power coefficients (R, A and T) calculated from the collected S parameter ( $S_{11}$  and  $S_{21}$ ) under various dipping-drying cycles are

shown in Fig. S3. Apparently, R, much higher than A, increases gradually with the increase of dipping-drying cycles. This is mainly ascribed to the impedance mismatch between the free space and TA-*x* owing to its superior electrical conductivity. It is noted that R and A are quantitative characteristics of power balance, while EMI SE is a relative quantity and is unrelated to the absolute power coefficients.

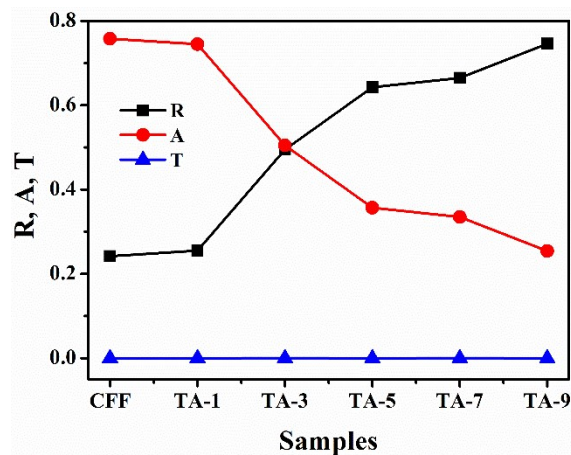

**Fig. S3.** The power coefficients at the frequency of 10.3 GHz for the CFF as well as TA-*x*.

#### 4. $SE_R/SE_T$ and $SE_A/SE_T$ of the CFF and TA-*x*

As a result of the porous structure, the entered EMW are trapped in the foam and endlessly attenuated among the cell walls, being not able to escape from the limited space until they are absorbed. Fig. S4 presents the ratio of  $SE_R$  or  $SE_A$  to  $SE_T$  of the prepared samples, revealing much higher  $SE_A/SE_T$  than  $SE_R/SE_T$ .

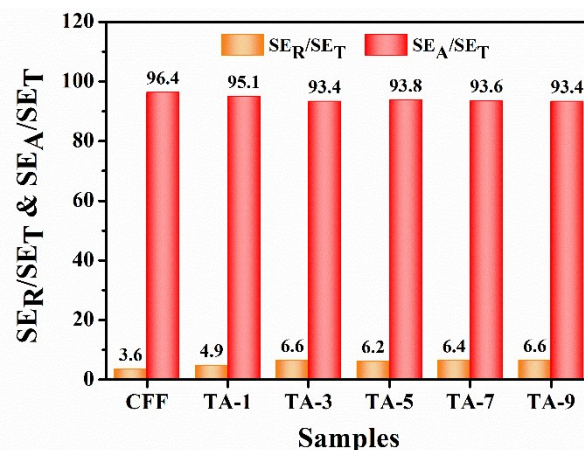

**Fig. S4.**  $SE_R/SE_T$  and  $SE_A/SE_T$  of the pure CFF and prepared TA-x.

### 5. The calculations for the theoretical EMI SE of the TPU-coated AgNWs@CFF

The theoretical EMI shielding performance of the TPU-coated AgNWs@CFF was calculated based on the following equations [26,27].

$$SE_R = 39.5 + 10 \log \frac{\sigma}{2\pi f \mu} \quad (1)$$

$$SE_A = 8.7 d \sqrt{\pi f \mu \sigma} \quad (2)$$

Where  $\sigma$  is the electrical conductivity of materials and  $d$  is the thickness of sample.

### 6. The current variations of TA-x for multicycle compression

The structural stability and durability of the prepared TA-x could be further confirmed by evaluating the current variation upon cyclic compressions (Fig. S5). The current output is nearly invariable, and the waveform of current curve after 1200 cycles is almost the same as its initial response, revealing the excellent structural stability and durability of the prepared TA-x.

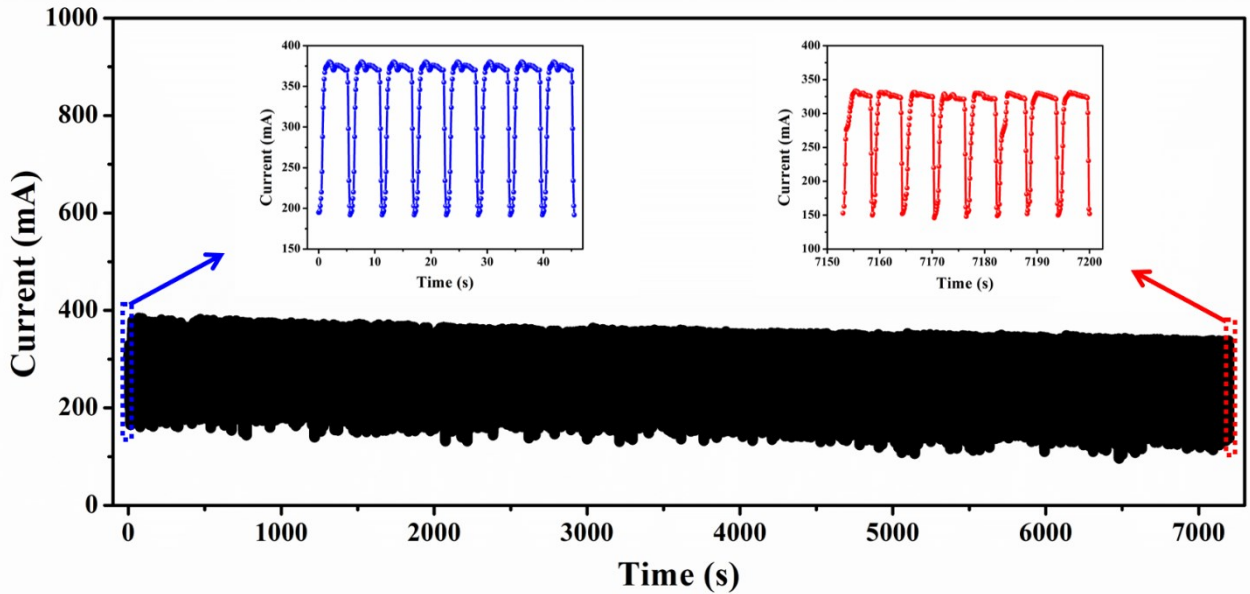

**Fig. S5.** Current variations of TA-x for 1200 cycles of loading-unloading at 9% of strain.

### 7. The current response of various joints bending

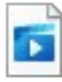

Finger bending response.mp4

**Video. S1.** Finger bending response.

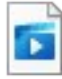

Elbow bending response.mp4

**Video S2.** Elbow bending response.

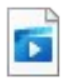

Tiptoe stepping response.mp4

**Video. S3.** Tiptoe stepping response.

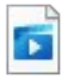

Heel stepping response.mp4

**Video. S4.** Heel stepping response.
